# Supplementary material for: Single-Cell Transcriptome Analysis of Chronic Antibody-Mediated Rejection After Renal Transplantation
Source: Front Immunol. 2022 Jan 17;12:767618. doi: 10.3389/fimmu.2021.767618 (PMC8801944; doi:10.3389/fimmu.2021.767618)
Supplement: Supplementary Table 4 — DEGs in each T cell subsets from cABMR and control subjects shown in heatmap. Abbreviations were as follows: pct.1, the percentage of cells where the gene is detected in the first group (cABMR patients); pct.2, the percentage of cells where the gene is detected in the second group (control subject); avg logFC, log fold-change of the average expression between the two groups, positive values indicate that the gene is more highly expressed in the first group. [file Table_4.xlsx]

## Sheet: CD8  effector T cells
gene_id	p_val	avg_logFC	pct.1	pct.2	p_val_adj
MT-ND6	0	2.94917	0.965	0.051	0
CXCL8	0	2.22531	0.906	0.054	0
NFKBIA	0	1.52852	0.775	0.161	0
TNFAIP3	4.53e-207	1.19268	0.505	0.111	9.41e-203
CXCR4	8.5e-230	1.15386	0.632	0.176	1.77e-225
CCL4L2	9.16e-149	1.11649	0.294	0.036	1.9e-144
ZFP36	2.6e-188	1.00335	0.501	0.113	5.41e-184
CD69	1.72e-102	0.900239	0.518	0.219	3.58e-98
NFKBIZ	1.97e-146	0.868218	0.331	0.052	4.1e-142
JUN	7.46e-91	0.76028	0.405	0.142	1.55e-86
S100A9	3.99e-182	0.746502	0.759	0.282	8.29e-178
DUSP10	7.66e-80	0.667932	0.201	0.036	1.59e-75
RPL26	7.02e-94	0.622309	0.745	0.437	1.46e-89
DUSP2	9.6e-50	0.613595	0.214	0.069	2e-45
FOS	4.66e-88	0.613242	0.268	0.061	9.68e-84
RGS2	1.5e-83	0.598972	0.335	0.099	3.11e-79
ZBTB1	2.52e-71	0.585481	0.518	0.252	5.24e-67
PTGS2	4.55e-74	0.516967	0.149	0.017	9.45e-70
S100A8	7.38e-117	0.516136	0.706	0.302	1.53e-112
PMAIP1	1.76e-51	0.508771	0.153	0.033	3.66e-47
SELL（CD62L）	3.56e-51	0.488185	0.213	0.065	7.41e-47
SOD2	9.97e-57	0.473658	0.221	0.064	2.07e-52
IL1B	1.99e-70	0.446507	0.104	0.003	4.13e-66
IFNG	1.05e-21	0.362525	0.144	0.061	2.18e-17
TGFB1	6.76e-28	0.345835	0.315	0.166	1.4e-23
GZMB	7.58e-24	-0.569161	0.422	0.506	1.58e-19
IL7R	1.11e-15	-0.570413	0.232	0.319	2.31e-11
PRDX1	1.97e-29	-0.636072	0.05	0.156	4.08e-25
CD2	1.67e-77	-0.683453	0.535	0.701	3.47e-73
ICAM3	3.14e-41	-0.697721	0.029	0.155	6.53e-37
TRBC2	2.05e-245	-0.827239	0.771	0.937	4.25e-241
IGHE	0	-1.55337	0.495	0.922	0
IGKC	0	-2.06143	0.696	0.992	0

## Sheet: CD8 MAIT
gene_id	p_val	avg_logFC	pct.1	pct.2	p_val_adj
MT-ND6	1.56e-28	2.66869	0.962	0.071	3.24e-24
CXCL8	2.49e-26	2.39966	0.899	0.036	5.17e-22
NFKBIA	7.89e-23	2.10972	0.962	0.333	1.64e-18
TNFAIP3	1.72e-19	2.05344	0.848	0.19	3.58e-15
ZFP36	2.92e-19	1.75891	0.835	0.143	6.06e-15
JUN	5.31e-14	1.5549	0.81	0.274	1.1e-09
CD69	3.97e-15	1.50399	0.911	0.5	8.24e-11
FOS	1.06e-14	1.43956	0.772	0.143	2.2e-10
CXCR4	7.88e-15	1.39376	0.899	0.405	1.64e-10
DUSP1	1.54e-13	1.3693	0.835	0.333	3.21e-09
CCL3L1	1.18e-07	1.31277	0.291	0	0.00245296
NFKBIZ	8.73e-11	1.28717	0.582	0.083	1.81e-06
DUSP2	4.43e-09	1.19732	0.608	0.167	9.21e-05
JUNB	1.24e-09	1.18629	0.759	0.369	2.57e-05
CCL4L2	3.07e-05	1.01947	0.19	0	0.637126
JUND	0.000245182	0.924245	0.241	0.048	1
S100A9	4.05e-12	0.890773	0.81	0.262	8.41e-08
NR4A2	2.11e-05	0.863445	0.278	0.036	0.439378
FOSB	0.000134867	0.845762	0.19	0.012	1
DUSP10	0.000415408	0.834307	0.241	0.048	1
PMAIP1	0.000302783	0.80041	0.266	0.06	1
RPS15A	1.22e-07	0.692191	0.975	0.714	0.00253537
CD7	0.000588453	0.652606	0.481	0.214	1
TGFB1	0.00111579	0.620579	0.38	0.155	1
CD244	0.0372798	0.561054	0.19	0.083	1
IL23R	0.00154055	0.536978	0.114	0	1
SEL1L	0.156237	0.284397	0.139	0.071	1
HLA-B	0.000132747	-0.462275	0.949	0.893	1
CD226	0.458154	-0.465888	0.101	0.131	1
CD247	0.0219047	-0.466309	0.177	0.321	1
HBA2	0.00678215	-0.80077	0.038	0.167	1
HBA1	0.000287754	-0.908127	0	0.155	1
TUBA1B	5.62e-05	-0.987415	0.025	0.238	1
CD27	0.000193235	-0.99235	0.013	0.19	1
TRAV12-2	7.85e-06	-1.00905	0	0.226	0.163162
UBB	1.06e-08	-1.17789	0.291	0.655	0.000220414
TRBV20-1	0.00197961	-1.30126	0.139	0.345	1
TRAV13-1	6.59e-06	-1.39476	0.013	0.262	0.136923
IGHE	2.81e-20	-1.74045	0.38	0.929	5.85e-16
IGKC	4.61e-25	-1.90051	0.709	0.976	9.58e-21

## Sheet: γδT cells
gene_id	p_val	avg_logFC	pct.1	pct.2	p_val_adj
MT-ND6	1.61e-163	3.12402	0.972	0.042	3.35e-159
CXCL8	1.22e-136	2.16701	0.918	0.06	2.53e-132
NFKBIA	8.32e-77	1.63312	0.81	0.212	1.73e-72
ZFP36	8.18e-42	1.10744	0.582	0.144	1.7e-37
CXCR4	1.14e-34	1.06402	0.572	0.18	2.37e-30
TNFAIP3	8.24e-33	1.05442	0.502	0.136	1.71e-28
NFKBIZ	1.69e-36	1.00921	0.4	0.054	3.52e-32
JUN	1.47e-14	0.849823	0.385	0.162	3.05e-10
S100A9	5e-46	0.849305	0.775	0.25	1.04e-41
FOS	7.59e-16	0.814134	0.272	0.072	1.58e-11
PPP1R15A	1.53e-25	0.808318	0.37	0.078	3.18e-21
DUSP1	8.66e-28	0.796894	0.538	0.168	1.8e-23
DUSP10	9.65e-20	0.761602	0.208	0.02	2.01e-15
CCL4L2	4.68e-22	0.704157	0.302	0.06	9.72e-18
PMAIP1	1.22e-16	0.685571	0.22	0.038	2.54e-12
MCL1	9.38e-17	0.629644	0.492	0.216	1.95e-12
PTGS2	5.02e-18	0.625038	0.18	0.014	1.04e-13
S100A8	5.38e-29	0.596097	0.725	0.286	1.12e-24
CD8A	2.35e-07	0.571852	0.228	0.104	0.00487463
ZBTB1	2.23e-16	0.564071	0.612	0.318	4.64e-12
SELL	3.14e-15	0.556408	0.348	0.118	6.53e-11
CD84	2.24e-07	0.35496	0.3	0.152	0.00465733
IL16	0.00359464	-0.351353	0.208	0.276	1
CD2	1.87e-09	-0.52072	0.43	0.574	3.88e-05
ILK	5.28e-11	-0.643854	0.005	0.114	1.1e-06
GZMB	2.44e-14	-0.673793	0.485	0.666	5.06e-10
PRELID1	3.92e-09	-0.707048	0.045	0.166	8.15e-05
HBB	7.46e-05	-0.714225	0.152	0.24	1
ICAM2	1.12e-11	-0.783748	0.022	0.156	2.32e-07
HBA2	2.27e-09	-0.872666	0.055	0.182	4.73e-05
TRAC	3.45e-62	-1.0598	0.672	0.92	7.17e-58
UBB	1.54e-55	-1.40724	0.348	0.744	3.19e-51
IGHE	7.34e-94	-1.51396	0.525	0.936	1.53e-89
IGKC	3.89e-142	-2.19476	0.672	0.994	8.08e-138
